# Supplementary material for: Binary ZnO/Zn–Cr nanospinel catalysts prepared by a hydrothermal method for isobutanol synthesis from syngas
Source: Royal Society of Chemistry journal article supplement (doi:10.1039/c8cy00030a), 2018-01-01
Supplement: c8cy00030a1.pdf [file c8cy00030a1.pdf]

**Binary ZnO/Zn-Cr nanospinel catalyst prepared by hydrothermal method for isobutanol synthesis from syngas**

Xiaofeng Gao,<sup>a,b</sup> Yingquan Wu,<sup>a</sup> Tao Zhang,<sup>a</sup> Liyan Wang,<sup>a,b</sup> Xiaoli Li,<sup>a,b</sup> Hongjuan Xie<sup>a</sup> and Yisheng Tan<sup>\*a,c</sup>

<sup>a</sup> State Key Laboratory of Coal Conversion, Institute of Coal Chemistry, Chinese Academy of Sciences, Taiyuan 030001, China. Email: tan@sxicc.ac.cn. Fax: +86 351 4044287. Tel: +86 351 4044287.

<sup>b</sup> University of Chinese Academy of Sciences, Beijing 100049, China

<sup>c</sup> National Engineering Research Center for Coal-Based Synthesis, Institute of Coal Chemistry, Chinese Academy of Sciences, Taiyuan 030001, China

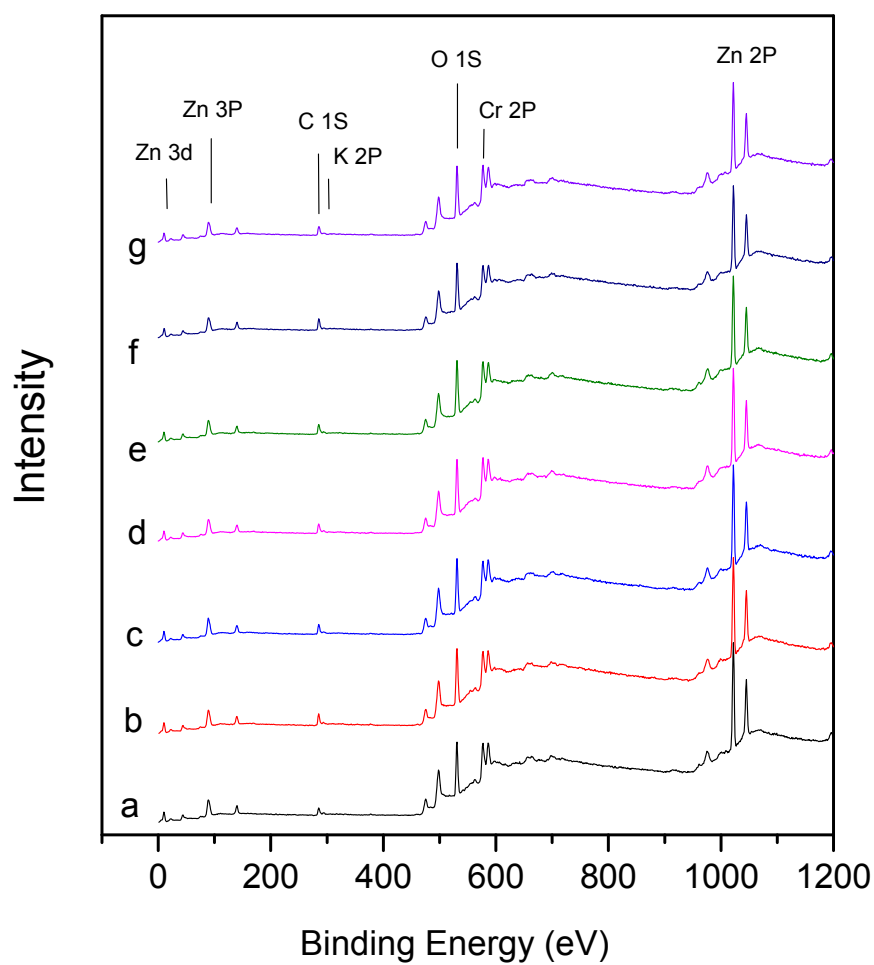

Fig. S1 XPS spectrum of ZnCr-x-100 and ZnCr-16-y catalysts: (a) ZnCr-8-100; (b) ZnCr-16-100; (c) ZnCr-24-100; (d) ZnCr-48-100; (e) ZnCr-16-80; (f) ZnCr-16-160; (g) ZnCr-16-160

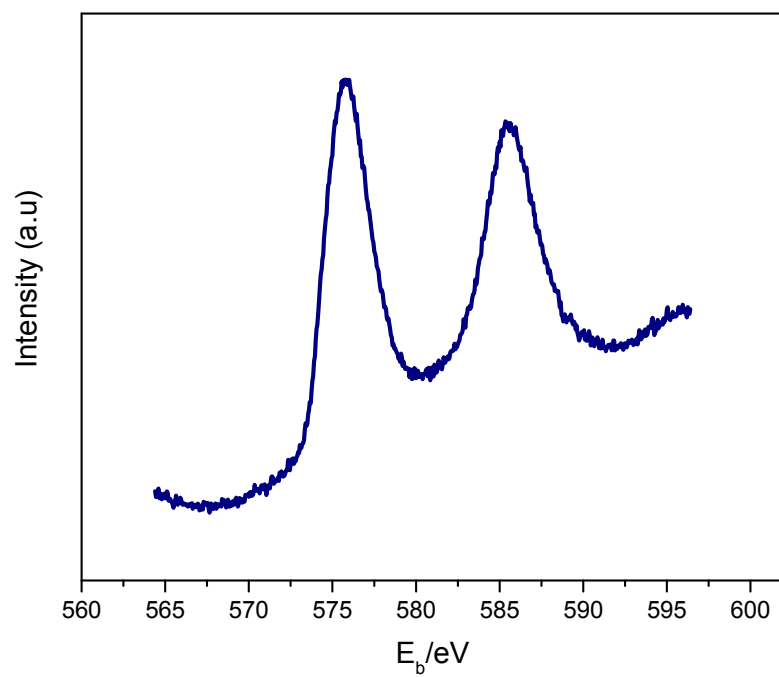

Fig. S2 The Cr 2p XPS spectrum of the reduced ZnCr-16-160 catalyst;

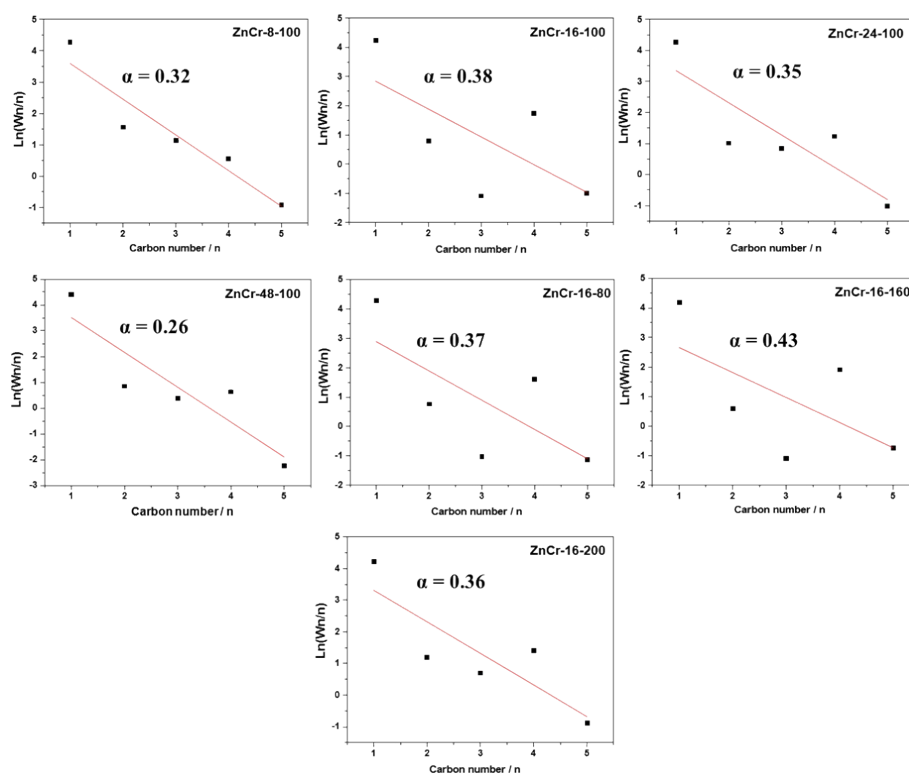

Fig. S3 Anderson–Schulz–Flory (ASF) plots for the distribution of alcohols for different catalysts at 10 h reaction. The ASF chain growth probability  $\alpha$  of products is calculated according to the equation  $\ln(W_n/n) = n \ln \alpha + \ln(1 - \alpha)^2 / \alpha$ , in which  $n$  is the number of carbon atoms in products,  $W_n$  is the weight fraction of products containing  $n$  carbon atoms, and  $1 - \alpha$  is the probability of chain termination.

Table S1 the catalytic performance of ZnCr catalysts by different methods

| Catalysts                | CO<br>Conversion<br>( % ) | Alcohol<br>Selectivity<br>( % ) | Total alcohol<br>production<br>rate<br>( g • ml <sup>-1</sup> • h <sup>-1</sup> ) | Alcohol distribution (wt%) |      |        |        |                    |
|--------------------------|---------------------------|---------------------------------|-----------------------------------------------------------------------------------|----------------------------|------|--------|--------|--------------------|
|                          |                           |                                 |                                                                                   | MeOH                       | EtOH | n-PrOH | i-BuOH | C <sup>5+</sup> OH |
| Comb-ZnCr <sup>a</sup>   | 17.4                      | 50.9                            | 0.075                                                                             | 78.4                       | 4.2  | 2.9    | 13.6   | 0.8                |
| Impr-ZnCr <sup>b</sup>   | 19.7                      | 38.6                            | 0.063                                                                             | 73.4                       | 2.7  | 3.2    | 18.0   | 1.7                |
| Copr-ZnCr <sup>c</sup>   | 21.9                      | 43.8                            | 0.094                                                                             | 72.6                       | 1.6  | 2.1    | 19.4   | 1.0                |
| Solgel-ZnCr <sup>d</sup> | 16.8                      | 67.3                            | 0.092                                                                             | 68.7                       | 3.1  | 3.9    | 20.9   | 1.6                |
| Hydro-ZnCr <sup>e</sup>  | 19.2                      | 60.2                            | 0.111                                                                             | 65.2                       | 3.6  | 1.0    | 27.0   | 2.3                |

<sup>a</sup> combustion method<sup>b</sup> impregnation method<sup>c</sup> co-precipitation method<sup>d</sup> sol-gel method<sup>e</sup> hydrothermal method
